# Supplementary material for: Electrochromic active layers from ultrathin nanowires of tungsten oxide
Source: Royal Society of Chemistry journal article supplement (doi:10.1039/c4tc00093e), 2014-01-01
Supplement: c4tc00093e1.pdf [file c4tc00093e1.pdf]

## Supporting Information:

### Electrochromic Devices from Ultrathin Nanowires of Tungsten Oxide

Brian Moshofsky and Taleb Mokari\*

Department of Chemistry and Ilse Katz Institute for Nanoscale Science and Technology, Ben-Gurion University of the Negev, Beersheva 84105, Israel

\* [mokari@bgu.ac.il](mailto:mokari@bgu.ac.il)

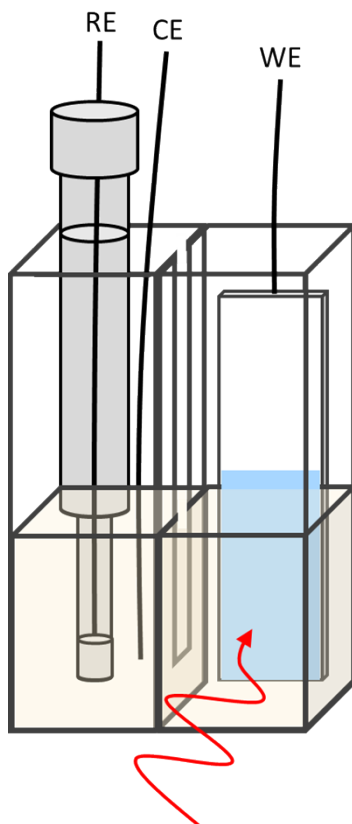

**Figure S1.** Depiction of the setup used to measure optical changes of  $\text{WO}_x$  films along with applied potentials.

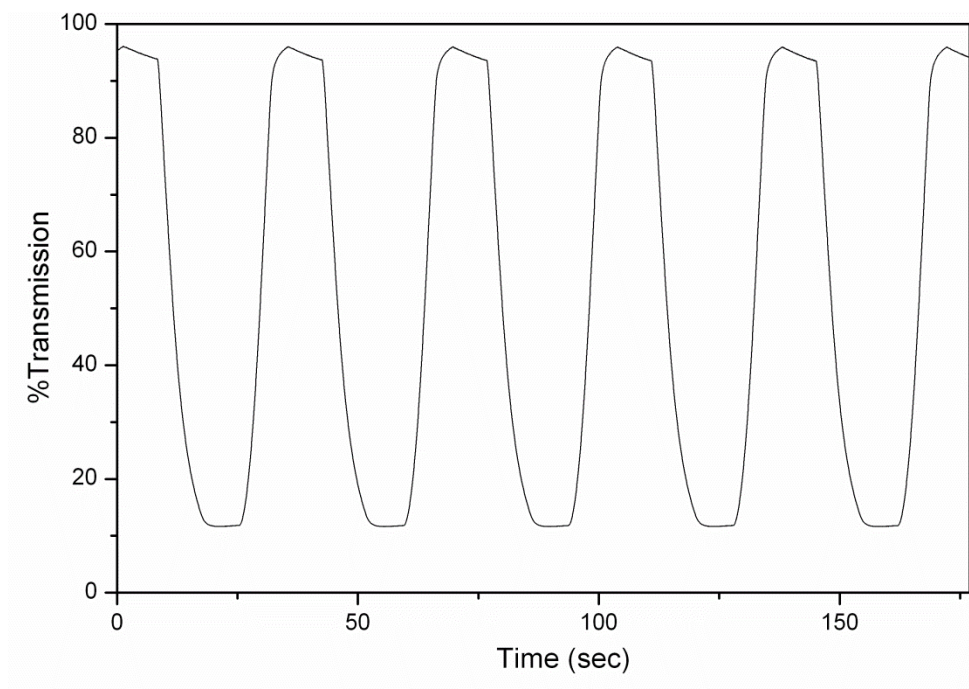

**Figure S2.** Five color bleach cycles for our 4-layer films with a charge insertion of 20 mC (film area was 1.2 cm<sup>2</sup>). Films achieve a coloration change of over 80% transmission and return to their full transparency upon bleaching.

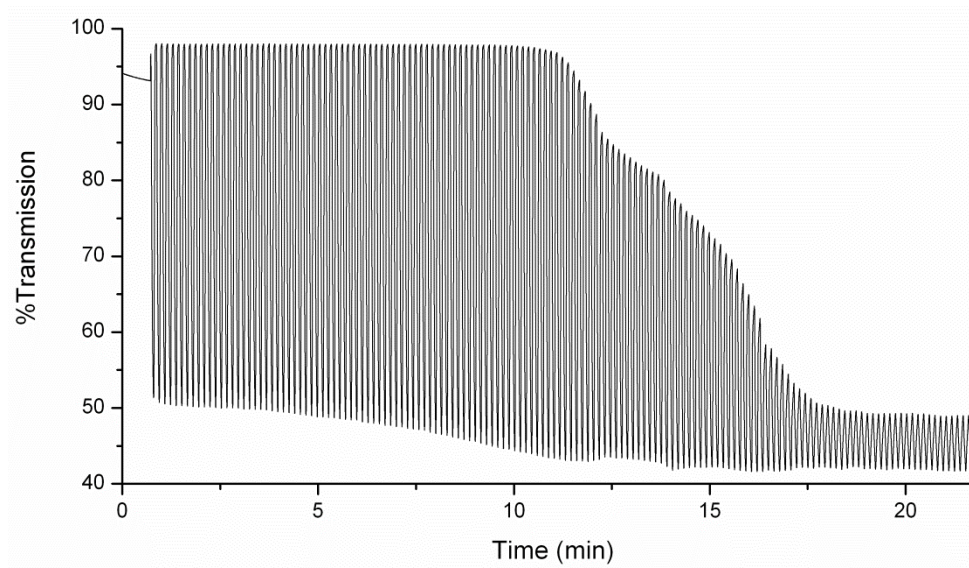

**Figure S3.** Stability test for a 100 nm thick film. The charge insertion/extraction here was ~5 mC. This graph demonstrates the irreversible coloring that occurs with excess reduction and charge insertion.
